# Supplementary material
Source: PubMed Central journal article supplement (PMC8013093)
Supplement: 2337_table.pdf [file 2337_table.pdf]

**On-line Table: Demographic and injury data**

| Patient No. | Age (yr)/Sex | Maxilla Fracture |  | Associated Fracture                   | Mechanism                 |
|-------------|--------------|------------------|--|---------------------------------------|---------------------------|
|             |              | Side             |  |                                       |                           |
| 1           | 32/M         | Right            |  | Bilateral mandibular rami             | MVC                       |
| 2           | 39/M         | Right            |  | Right mandibular ramus                | MVC                       |
| 3           | 33/M         | Left             |  | Left mandibular ramus and right angle | Assault                   |
| 4           | 43/M         | Right            |  | None                                  | MVC                       |
| 5           | 26/M         | Left             |  | Left mandibular angle and right body  | MVC                       |
| 6           | 19/M         | Right            |  | Right mandibular body and right angle | MVC                       |
| 7           | 28/M         | Left             |  | Left mandibular ramus and right body  | MVC                       |
| 8           | 29/M         | Right            |  | None                                  | MVC                       |
| 9           | 40/M         | Left             |  | Right mandibular condyle              | MVC                       |
| 10          | 22/M         | Right            |  | None                                  | MVC                       |
| 11          | 39/M         | Right            |  | Right mandibular body                 | MVC                       |
| 12          | 26/M         | Left             |  | Left mandibular ramus                 | GSW <sup>a</sup>          |
| 13          | 26/F         | Left             |  | None                                  | GSW <sup>a</sup>          |
| 14          | 21/F         | Left             |  | Left mandibular angle and right body  | MVC                       |
| 15          | 39/M         | Left             |  | Left subcondylar                      | Assault                   |
| 16          | 58/F         | Left             |  | None                                  | MVC                       |
| 17          | 47/M         | Left             |  | None                                  | Power washer <sup>b</sup> |
| 18          | 58/F         | Left             |  | Left mandibular ramus                 | Unknown                   |
| 19          | 27/M         | Right            |  | None                                  | MVC                       |
| 20          | 53/M         | Left             |  | None                                  | MVC                       |
| 21          | 23/F         | Left             |  | None                                  | MVC                       |
| 22          | 46/M         | Right            |  | Right mandibular body and pterygoid   | MVC                       |

<sup>a</sup> Injury remote from the face.

<sup>b</sup> Blow to the submandibular area from compressed water via a high-pressure power washer.
